# Supplementary material for: Major Oncogenic Drivers and Their Clinicopathological Correlations in Sporadic Childhood Papillary Thyroid Carcinoma in Belarus
Source: MDPI journal article supplement (doi:10.3390/cancers13133374), 2021-07-05
Supplement: s1 [file s1]

**Table S1.** Clinicopathological features of sporadic childhood PTCs according to the oncogenes

|                            | <i>BRAF</i> <sup>V600E</sup> | <i>RET/PTC1</i> | <i>RET/PTC3</i> | <i>ETV6ex4/NTRK3</i> | <i>TBL1XR1/RET</i> <sup>1</sup> | <i>TNIP1/RET</i> <sup>1</sup> | Any <i>RET/PTC</i> | Unknown     |
|----------------------------|------------------------------|-----------------|-----------------|----------------------|---------------------------------|-------------------------------|--------------------|-------------|
| Number of patients         | 5 (14.7%)                    | 4 (11.8%)       | 6 (17.6%)       | 6 (17.6%)            | 1 (2.9%)                        | 1 (2.9%)                      | 12 (35.3%)         | 11 (32.4%)  |
| Age, mean ± SD, years      | 13.6 ± 1.2                   | 11.7 ± 2.0      | 11.9 ± 3.2      | 12.6 ± 1.5           | 11.4                            | 13.0                          | 11.9 ± 2.4         | 12.2 ± 3.1  |
| Sex, F/M (%F)              | 5/0 (100%)                   | 3/1 (75%)       | 1/5 (16.7%)     | 5/1 (83.3%)          | 1/0 (100%)                      | 1/0 (100%)                    | 6/6 (50%)          | 6/5 (54.5%) |
| Tumors size, mean ± SD, mm | 14.4 ± 3.4                   | 21.3 ± 15.9     | 19.3 ± 10.1     | 12.8 ± 2.9           | 17                              | 35                            | 21.1 ± 11.7        | 15.7 ± 8.5  |
| microcarcinoma             | 1 (20%)                      | 0               | 1 (16.7%)       | 1 (16.7%)            | 0                               | 0                             | 1 (8.3%)           | 3 (27.3%)   |
| 11-20 mm                   | 4 (80%)                      | 3 (75%)         | 2 (33.3%)       | 5 (83.3%)            | 1 (100%)                        | 0                             | 6 (50.0%)          | 5 (45.5%)   |
| ≥ 21 mm                    | 0                            | 1 (25%)         | 3 (50.0%)       | 0                    | 0                               | 1 (100%)                      | 5 (41.7%)          | 3 (27.3%)   |
| pT category                |                              |                 |                 |                      |                                 |                               |                    |             |
| 1                          | 5 (100%)                     | 3 (75%)         | 2 (33.3%)       | 6 (100%)             | 1 (100%)                        | 0                             | 6 (50%)            | 8 (72.7%)   |
| 2                          | 0                            | 0               | 1 (16.7%)       | 0                    | 0                               | 1 (100%)                      | 2 (16.7%)          | 3 (27.3%)   |
| 3                          | 0                            | 1 (25%)         | 3 (50.0%)       | 0                    | 0                               | 0                             | 4 (33.3%)          | 0           |
| Lymph node metastasis      | 5 (100%)                     | 4 (100%)        | 6 (100%)        | 3 (50%)              | 1 (100%)                        | 1 (100%)                      | 12 (100%)          | 6 (54.5%)   |
| N1a                        | 2 (40%)                      | 1 (25%)         | 0               | 0                    | 0                               | 0                             | 1 (8.3%)           | 1 (9.1%)    |
| N1b                        | 3 (60%)                      | 3 (75%)         | 6 (100%)        | 3 (50%)              | 1 (100%)                        | 1 (100%)                      | 11 (91.7%)         | 5 (45.5%)   |
| Distant metastasis         | 0                            | 0               | 1 (16.7%)       | 0                    | 0                               | 0                             | 1 (8.3%)           | 0           |
| Multifocality              | 0                            | 1 (25%)         | 2 (33.3%)       | 1 (16.7%)            | 0                               | 1 (100%)                      | 4 (33.3%)          | 1 (9.1%)    |
| Intrathyroidal spread      | 4 (80%)                      | 3 (75%)         | 6 (100%)        | 5 (83.3%)            | 1 (100%)                        | 1 (100%)                      | 11 (91.7%)         | 8 (72.7%)   |
| Extrathyroidal extension   | 0                            | 0               | 3 (50.0%)       | 0                    | 0                               | 0                             | 3 (25.0%)          | 0           |
| Vascular invasion          | 5 (100%)                     | 4 (100%)        | 6 (100%)        | 6 (100%)             | 1 (100%)                        | 1 (100%)                      | 12 (100%)          | 10 (90.9%)  |
| Tumor capsule              | 0                            | 0               | 0               | 0                    | 0                               | 0                             | 0                  | 2 (18.2%)   |
| Invasiveness score         |                              |                 |                 |                      |                                 |                               |                    |             |
| 0                          | 0                            | 0               | 0               | 0                    | 0                               | 0                             | 0                  | 1 (9.1%)    |
| 1                          | 0                            | 0               | 0               | 1 (16.7%)            | 0                               | 0                             | 0                  | 1 (9.1%)    |
| 2                          | 1 (20%)                      | 1 (25%)         | 0               | 2 (33.3%)            | 0                               | 0                             | 1 (8.3%)           | 4 (36.4%)   |
| 3                          | 4 (80%)                      | 2 (50%)         | 0               | 2 (33.3%)            | 1 (100%)                        | 0                             | 3 (25.0%)          | 4 (36.4%)   |
| 4 (max)                    | 0                            | 1 (25%)         | 6 (100%)        | 1 (16.7%)            | 0                               | 1 (100%)                      | 8 (66.7%)          | 1 (9.1%)    |
| Clinical stage             |                              |                 |                 |                      |                                 |                               |                    |             |
| I                          | 5 (100%)                     | 4 (100%)        | 5 (83.3%)       | 6 (100%)             | 1 (100%)                        | 1 (100%)                      | 11 (91.7%)         | 1 (100%)    |
| II                         | 0                            | 0               | 1 (16.7%)       | 0                    | 0                               | 0                             | 1 (8.3%)           | 0           |
| Dominant component         |                              |                 |                 |                      |                                 |                               |                    |             |
| papillary                  | 5 (100%)                     | 4 (100%)        | 1 (16.7%)       | 1 (16.7%)            | 0                               | 1 (100%)                      | 6 (50.0%)          | 4 (36.4%)   |
| follicular                 | 0                            | 0               | 0               | 4 (66.7%)            | 0                               | 0                             | 0                  | 6 (54.5%)   |
| solid-trabecular           | 0                            | 0               | 5 (83.3%)       | 1 (16.7%)            | 1 (100%)                        | 0                             | 6 (50.0%)          | 1 (9.1%)    |

<sup>1</sup> these fusion genes were discovered using RNA-seq as described in details in the corresponding subsection below

**Table S2.** Statistical assessment of clinicopathological features of sporadic childhood PTCs according to the oncogene<sup>1</sup>

|                          | <i>BRAF</i> <sup>V600E</sup> | <i>RET/PTC1</i>     | <i>RET/PTC3</i>         | <i>ETV6ex4/NTRK3</i> | <i>TBLIXR1/RET</i>  | <i>TNIP1/RET</i>    | Any <i>RET/PTC</i>  | Unknown             |
|--------------------------|------------------------------|---------------------|-------------------------|----------------------|---------------------|---------------------|---------------------|---------------------|
| Number of patients (%)   | 5 (14.7%)                    | 4 (11.8%)           | 6 (17.6%)               | 6 (17.6%)            | 1 (2.9%)            | 1 (2.9%)            | 12 (35.3%)          | 11 (32.4%)          |
| Age at operation, years  | 0.196; 0.193                 | 0.364; -0.131       | 0.775; -0.046           | 0.912; -0.020        | 0.588; -0.110       | 0.941; 0.022        | 0.292; -0.156       | 0.856; 0.029        |
| Sex                      | 0.137; <b>0.307</b>          | 1.0; 0.079          | <b>0.014; 0.465</b>     | 0.389; 0.180         | 1.0; 0.129          | 1.0; 0.129          | 0.265; 0.227        | 0.459; 0.147        |
| Tumor size, mm           | 0.962; -0.011                | 0.630; 0.071        | 0.612; 0.077            | 0.364; 0.136         | 0.647; 0.090        | 0.176; 0.218        | 0.146; 0.218        | 0.490; -0.103       |
| microcarcinoma           | 1.0; 0.026                   | 1.0; 0.169          | 1.0; 0.012              | 1.0; 0.012           | 1.0; 0.081          | 1.0; 0.081          | 0.389; 0.180        | 0.363; 0.175        |
| 11-20 mm                 | 0.379; 0.179                 | 0.627; 0.120        | 0.202; 0.240            | 0.364; 0.231         | 1.0; 0.146          | 0.412; 0.208        | 0.487; 0.132        | 0.458; 0.188        |
| ≥ 21 mm                  | 0.309; 0.230                 | 1.0; 0.013          | 0.126; 0.289            | 0.297; 0.257         | 1.0; 0.097          | 0.235; <b>0.314</b> | 0.098; <b>0.316</b> | 1.0; 0.061          |
| pT category              | 0.348; 0.249                 | 0.511; 0.199        | <b>0.005; 0.560</b>     | 0.269; 0.278         | 0.831; 0.104        | <b>0.050; 0.419</b> | <b>0.012; 0.508</b> | 0.160; <b>0.328</b> |
| pT1                      | 0.293; 0.249                 | 1.0; 0.012          | <b>0.031; 0.422</b>     | 0.162; 0.278         | 1.0; 0.104          | 0.265; 0.290        | <b>0.040; 0.394</b> | 1.0; 0.013          |
| pT2 and pT3              | 0.293; 0.249                 | 1.0; 0.012          | <b>0.031; 0.422</b>     | 0.162; 0.278         | 1.0; 0.104          | 0.265; 0.290        | <b>0.040; 0.394</b> | 1.0; 0.013          |
| Lymph node metastasis    | 0.309; 0.230                 | 0.551; 0.203        | 0.297; 0.257            | 0.126; 0.289         | 1.0; 0.097          | 1.0; 0.097          | <b>0.030; 0.410</b> | 0.079; <b>0.357</b> |
| N1a                      | 0.094; <b>0.364</b>          | 0.409; 0.150        | 1.0; 0.169              | 1.0; 0.169           | 1.0; 0.064          | 1.0; 0.064          | 1.0; 0.079          | 1.0; 0.057          |
| N1b                      | 1.0; 0.041                   | 1.0; 0.079          | 0.069; <b>0.342</b>     | 0.641; 0.142         | 1.0; 0.129          | 1.0; 0.129          | <b>0.024; 0.417</b> | 0.138; 0.279        |
| Distant metastasis (M1)  | 1.0; 0.072                   | 1.0; 0.064          | 0.176; <b>0.376</b>     | 1.0; 0.081           | 1.0; 0.030          | 1.0; 0.030          | 0.353; 0.236        | 1.0; 0.120          |
| Multifocality            | 0.559; 0.192                 | 0.559; 0.070        | 0.281; 0.190            | 1.0; 0.012           | 1.0; 0.081          | 0.176; <b>0.376</b> | 0.154; <b>0.304</b> | 0.638; 0.155        |
| Intrathyroidal spread    | 1.0; 0.026                   | 0.559; 0.070        | 0.562; 0.214            | 1.0; 0.012           | 1.0; 0.081          | 1.0; 0.081          | 0.389; 0.180        | 0.363; 0.175        |
| Extrathyroidal extension | 1.0; 0.129                   | 1.0; 0.114          | <b>0.003; 0.672</b>     | 1.0; 0.144           | 1.0; 0.054          | 1.0; 0.054          | <b>0.037; 0.421</b> | 0.535; 0.215        |
| Vascular invasion        | 1.0; 0.072                   | 1.0; 0.064          | 1.0; 0.081              | 1.0; 0.081           | 1.0; 0.030          | 1.0; 0.030          | 1.0; 0.129          | 0.324; 0.252        |
| Tumor capsule            | 1.0; 0.104                   | 1.0; 0.091          | 1.0; 0.116              | 1.0; 0.116           | 1.0; <b>0.595</b>   | 1.0; 0.044          | 0.529; 0.185        | 0.098; <b>0.361</b> |
| Invasiveness score       | 0.322; <b>0.381</b>          | 1.0; 0.133          | <b>0.001; 0.717</b>     | 0.617; 0.266         | 1.0; 0.221          | 0.618; 0.270        | <b>0.008; 0.620</b> | 0.167; <b>0.413</b> |
| 0                        | 1.0; 0.072                   | 1.0; 0.064          | 1.0; 0.081              | 1.0; 0.081           | 1.0; 0.030          | 1.0; 0.030          | 1.0; 0.129          | 0.324; 0.252        |
| 1                        | 1.0; 0.104                   | 1.0; 0.091          | 1.0; 0.116              | 0.326; 0.212         | 1.0; 0.044          | 1.0; 0.044          | 0.529; 0.185        | 1.0; 0.094          |
| 2                        | 1.0; 0.035                   | 1.0; 0.013          | 0.297; 0.257            | 0.609; 0.107         | 1.0; 0.097          | 1.0; 0.097          | 0.210; 0.265        | 0.388; 0.209        |
| 3                        | 0.059; <b>0.357</b>          | 0.627; 0.088        | 0.062; <b>0.364</b>     | 1.0; 0.047           | 0.382; 0.221        | 1.0; 0.137          | 0.292; 0.201        | 1.0; 0.027          |
| 4                        | 0.291; 0.268                 | 1.0; 0.035          | <b>&lt;0.001; 0.717</b> | 0.644; 0.129         | 1.0; 0.112          | 0.294; 0.270        | <b>0.001; 0.604</b> | 0.113; <b>0.308</b> |
| Dominant component       | 0.063; <b>0.440</b>          | 0.125; <b>0.387</b> | <b>0.001; 0.656</b>     | 0.077; <b>0.384</b>  | 0.235; <b>0.314</b> | 1.0; 0.185          | <b>0.004; 0.569</b> | 0.087; <b>0.396</b> |
| papillary                | <b>0.016; 0.440</b>          | <b>0.039; 0.387</b> | 0.180; 0.282            | 0.180; 0.282         | 1.0; 0.164          | 0.471; 0.185        | 1.0; 0.044          | 0.477; 0.148        |
| follicular               | 0.291; 0.268                 | 0.296; 0.236        | 0.148; 0.081            | <b>0.048; 0.378</b>  | 1.0; 0.112          | 1.0; 0.112          | <b>0.006; 0.477</b> | <b>0.045; 0.381</b> |
| solid-trabecular         | 0.309; 0.230                 | 0.551; 0.203        | <b>0.001; 0.653</b>     | 1.0; 0.075           | 0.235; <b>0.314</b> | 1.0; 0.097          | <b>0.013; 0.461</b> | 0.227; 0.235        |
| Oncocytic changes        | 1.0; 0.104                   | 1.0; 0.091          | 1.0; 0.116              | 0.326; 0.212         | 1.0; 0.044          | 1.0; 0.044          | 0.529; 0.185        | 1.0; 0.094          |

<sup>1</sup> each cell contains two numbers: first is a p-value from the Mann-Whitney (age and tumor size) or Fisher exact test (all other categorical variables); the second is Kendall's tau-b rank correlation coefficient (age and tumor size) or Cramer's V effect size (all other categorical variables); the magnitude of the effect size: V~0.1 small, V~0.3 medium, V~0.5 large

**Table S3.** Frequency of the *BRAF*<sup>V600E</sup> mutation in pediatric PTC of radiation and sporadic etiology in different countries

| Country                  | Patients' age    | N  | <i>BRAF</i> <sup>V600E</sup> | %    | Sampling                 | Reference <sup>1</sup> |
|--------------------------|------------------|----|------------------------------|------|--------------------------|------------------------|
| <i>Radiation-related</i> |                  |    |                              |      |                          |                        |
| Belarus                  | 6-20             | 34 | 0                            | 0    | 1991-1992                | [1]                    |
| Belarus                  | 16.0 ± 5.0       | 64 | 10                           | 15.6 | 1995-1998                | [2]                    |
| Belarus/Ukraine          | 12-31            | 21 | 2                            | 9.5  | 1995-1998                | [1]                    |
| Ukraine                  | 13.8 (10.3-15.7) | 27 | 1                            | 3.5  | 1995-2001                | [3]                    |
| Ukraine                  | 14.3             | 15 | 0                            | 0    | 1998-2000                | [4]                    |
| Ukraine                  | 17.7 (14-24)     | 33 | 8                            | 24.2 | NS (2016) <sup>1,2</sup> | [5]                    |
| Ukraine                  | 18.0 (13 - 23)   | 26 | 2                            | 7.7  | 1998-2007                | [6]                    |
| Ukraine                  | 27.1             | 62 | 9                            | 14.5 | 1998-2007                | [7]                    |
| Ukraine                  | 15.9 (13-18)     | 16 | 2                            | 12.5 | 1998-2004                | [8]                    |
| Czech Republic           | NS (6-20)        | 2  | 0                            | 0    | 2003-2017                | [9]                    |
| Canada                   | <18              | 2  | 0                            | 0    | NS (2018)                | [10]                   |
| Colombia                 | 11.8             | 1  | 0                            | 0    | 2009-2018                | [11]                   |
| Brazil                   | ≤18              | 3  | 0                            | 0    | NS (2019)                | [12]                   |
| USA                      | <10-23           | 8  | 0                            | 0    | 2005-2016                | [13]                   |
| <i>Sporadic</i>          |                  |    |                              |      |                          |                        |
| Belarus                  | 12.4 (2-16)      | 34 | 5                            | 14.7 | 2001-2007                | Present study          |
| Ukraine                  | 11.9 (7.9-15.1)  | 8  | 0                            | 0    | 1995-2001                | [3]                    |
| Ukraine                  | 15.6 (5-19)      | 27 | 7                            | 25.9 | 1999-2009                | [6]                    |
| Ukraine                  | 16.3 (7-21)      | 32 | 6                            | 18.8 | NS (2016) <sup>2,3</sup> | [5]                    |
| Ukraine                  | 15.4 (10-18)     | 32 | 10                           | 31.3 | 1998-2004                | [8]                    |
| Czech Republic           | 16.3 (11-19)     | 81 | 15                           | 18.5 | 2003-2017                | [9]                    |
| Serbia                   | 8-18             | 8  | 1                            | 12.5 | 1995-2008                | [14]                   |
| France/Italy             | 8-19             | 28 | 3                            | 10.7 | 2002-2010                | [15]                   |
| Portugal/UK              | ≤18              | 17 | 1                            | 5.9  | NS, (1963-1992 UK)       | [16]                   |
| Portugal                 | 5-17             | 11 | 0                            | 0    | 2002-2007                | [17]                   |
| Turkey                   | 16 (6-18)        | 50 | 15                           | 30   | 1995-2015                | [18]                   |
| Turkey                   | 12.4 (1-17)      | 56 | 14                           | 25   | 1983-2015                | [19]                   |
| Saudi Arabia             | ≤18              | 84 | 9                            | 10.7 | 1998-2015                | [20]                   |
| Saudi Arabia             | 12-18            | 3  | 1                            | 33.3 | 1987-2006                | [21]                   |
| Saudi Arabia             | 17 (5-18)        | 48 | 9                            | 18.8 | 2004-2019                | [22]                   |
| India                    | ≤20              | 98 | 14                           | 14.3 | 2005-2018                | [23]                   |
| China                    | 3-13             | 48 | 17                           | 35.4 | 1994-2014                | [24]                   |
| China                    | <21              | 30 | 16                           | 53.3 | 2015-2018                | [25]                   |
| Japan                    | ≤20              | 81 | 44                           | 54.3 | 1991-2013                | [26]                   |
| Japan                    | 11.3 (< 15)      | 31 | 1                            | 3.2  | 1962-1995                | [4]                    |
| Japan                    | 12.7 (9-14)      | 9  | 3                            | 33.3 | 2013-2014                | [27]                   |

|          |                 |    |    |      |           |      |
|----------|-----------------|----|----|------|-----------|------|
| Brazil   | ≤18             | 35 | 3  | 8.6  | NS (2017) | [28] |
| Brazil   | ≤18             | 77 | 12 | 15.6 | NS (2019) | [12] |
| Colombia | 11.8            | 15 | 1  | 6.3  | 2009-2018 | [11] |
| USA      | 17.5 (10-21)    | 20 | 0  | 0    | NS (2005) | [29] |
| USA      | 15 (10-17)      | 20 | 4  | 20   | 1985-2004 | [30] |
| USA      | ≤21             | 11 | 2  | 18.2 | 2007-2011 | [31] |
| USA      | 12-16           | 5  | 2  | 40   | 2009-2012 | [32] |
| USA      | 10-19           | 27 | 10 | 37   | 2009-2014 | [33] |
| USA      | 14 (12-17)      | 13 | 4  | 30.8 | 2008-2012 | [34] |
| USA      | 13.7 (2-18)     | 19 | 7  | 36.8 | 1999-2012 | [35] |
| USA      | 14.7 (7.9-18.4) | 34 | 9  | 26.5 | 2001-2013 | [36] |
| USA      | 0-15            | 9  | 5  | 55.6 | 1973-2005 | [37] |
| USA      | 15 (4-18)       | 62 | 12 | 19.4 | 1989-2012 | [38] |
| USA      | 12-22           | 8  | 2  | 25   | NS (2017) | [39] |
| USA      | <17             | 8  | 0  | 0    | NS (2017) | [40] |
| USA      | 0-21            | 50 | 24 | 48.0 | 2003-2015 | [41] |
| USA      | <10-23          | 31 | 6  | 19.4 | 2005-2016 | [13] |
| USA      | 14 (6-18)       | 63 | 12 | 19.0 | 1989-2012 | [42] |
| Canada   | 14.4 (10-17)    | 28 | 5  | 17.9 | NS (2018) | [10] |

---

3 <sup>1</sup> NS, not specified (year of publication); <sup>2</sup> estimated period 1999-2009

**Table S4.** Frequency and prevalence of *RET/PTC1* and *RET/PTC3* rearrangements in pediatric PTC of radiation and sporadic etiology in different countries

| Country                  | Patients' age     | N  | <i>RET/PTC1</i> (%) | <i>RET/PTC3</i> (%) | Sampling               | Reference     |
|--------------------------|-------------------|----|---------------------|---------------------|------------------------|---------------|
| <i>Radiation-related</i> |                   |    |                     |                     |                        |               |
| Belarus                  | 8-19              | 12 | 2 (16.7)            | 6 (50)              | 1993-1995              | [43]          |
| Belarus                  | 15-18             | 38 | 6 (15.8)            | 22 (57.9)           | 1991-1992              | [44]          |
| Belarus                  | 8-15              | 51 | 12 (23.5)           | 12 (23.5)           | 1993-1997              | [45]          |
| Belarus, Ukraine         | < 15              | 61 | 13 (21.3)           | 3 (4.9)             | 1990-1994              | [46]          |
| Belarus, Ukraine         | < 15              | 45 | 7 (15.6)            | 12 (26.7)           | 1995-1996              | [46]          |
| Belarus                  | 12.9 (11-17)      | 32 | 9 (28.1)            | 1 (3.1)             | 1996                   | [47,48]       |
| Belarus                  | 6-18              | 39 | 9 (23.1)            | 11 (28.8)           | 1995-1997              | [49]          |
| Ukraine                  | 6-18              | 28 | 5 (17.9)            | 12 (42.9)           | 1995-1997              | [49]          |
| Belarus                  | ≤14               | 99 | 19 (19.2)           | 26 (26.3)           | 1993-1998              | [50]          |
| Belarus                  | 12.0 (10-17)      | 25 | 5 (20.0)            | 8 (32.0)            | NS (2001) <sup>1</sup> | [51]          |
| Ukraine                  | 12-31             | 21 | 2 (9.5)             | 6 (28.6)            | 1995-1998              | [1]           |
| Ukraine                  | 11-18             | 8  | 1 (12.5)            | 3 (37.5)            | NS (2005)              | [52]          |
| Ukraine                  | 18.0 (13-23)      | 26 | 4 (15.4)            | 7 (26.9)            | 1998-2007              | [6]           |
| Ukraine                  | 20.1-23.6 (20-29) | 62 | 14 (22.6)           | 8 (12.9)            | 1998-2007              | [7]           |
| Ukraine                  | 15.9 (13-18)      | 16 | 2 (12.5)            | 4 (25.0)            | 1998-2004              | [8]           |
| Czech Republic           | NS (6-20)         | 2  | 0                   | 0                   | 2003-2017              | [9]           |
| Canada                   | <18               | 2  | 0                   | 0                   | NS (2018)              |               |
| <i>Sporadic</i>          |                   |    |                     |                     |                        |               |
| Belarus                  | 12.4 (2-16)       | 34 | 4 (11.8)            | 6 (17.6)            | 2001-2007              | Present study |
| Ukraine                  | 15.6 (5-19)       | 27 | 5 (18.5)            | 2 (7.4)             | 1999-2009              | [6]           |
| Ukraine                  | 15.4 (10-18)      | 32 | 5 (15.6)            | 1 (3.1%)            | 1998-2004              | [8]           |
| Czech Republic           | NS (6-20)         | 81 | 12 (14.8)           | 6 (7.4)             | 2003-2017              | [9]           |
| Serbia                   | 8-18              | 8  | 5 (62.5)            | 0                   | 1992-2008              | [14]          |
| France                   | 9-15              | 4  | 0                   | 1 (25.0)            | NS (1997)              | [53]          |
| Italy                    | 16 (8-18)         | 25 | 5 (20)              | 4 (16.0)            | NS (2001)              | [51]          |
| Italy/France             | 8-19              | 28 | 2 (7.1)             | 6 (21.4)            | 2002-2010              | [15]          |
| Italy                    | 9-16              | 4  | 0 (0)               | 1 (25.0)            | NS (2002)              | [54]          |
| Italy                    | <19               | 9  | 3 (33.3)            | 1 (11.1)            | NS (1996)              | [55]          |
| Saudi Arabia             | 12-18             | 3  | 0                   | 0                   | 1987-2006              | [21]          |
| Saudi Arabia             | 17 (5-18)         | 48 | 9 (18.8)            | 4 (8.3)             | 2004-2019              | [22]          |
| China                    | ≤20               | 6  | 3 (50)              |                     | 2005-2006              | [56]          |
| China/HK                 | 12                | 1  | 0                   | 1 (100)             | NS (2002)              | [57]          |
| Japan                    | 11-19             | 31 | 10 (32.3)           | 4 (12.9)            | NS (2005)              | [58]          |
| Japan                    | 12.8 (9-14)       | 10 | 2 (20)              | 1 (10.0)            | 1980-1995              | [59]          |
| Japan                    | 12.7 (9-14)       | 9  | 3 (33.3)            | 0                   | 2013-2014              | [27]          |

|        |                 |    |           |          |            |      |
|--------|-----------------|----|-----------|----------|------------|------|
| Brazil | ≤18             | 35 | 6 (17.1)  | 6 (17.1) | NS (2017)  | [28] |
| USA    | 9               | 1  | 1 (100)   | 0        | NS (2004)  | [60] |
| USA    | 18 (6-21)       | 33 | 8 (24.2)  | 2 (6.1)  | NS (2002)  | [61] |
| USA    | 15-18           | 23 | 8 (34.8)  | 3 (13.0) | since 1974 | [44] |
| USA    | ≤21             | 11 | 3 (27.3)  | 0        | 2007-2011  | [31] |
| USA    | NS              | 5  | 1 (20.0)  | 0        | 2009-2012  | [32] |
| USA    | 14 (12-17)      | 13 | 1 (7.7)   | 1 (7.7)  | 2008-2012  | [34] |
| USA    | 14.7 (7.9-18.4) | 34 | 5 (14.7)  | 1 (2.9)  | 2001-2013  | [36] |
| USA    | 15 (4-18)       | 62 | 10 (16.1) | 2 (3.2)  | 1989-2012  | [38] |
| USA    | 12-22           | 8  | 1 (12.5)  | 0        | NS (2017)  | [39] |
| USA    | 17.5 (11-21)    | 12 | 5 (41.7)  | 2 (16.7) | NS (2005)  | [29] |
| USA    | 14 (6-18)       | 63 | 5 (7.9)   | 4 (6.3)  | 1989-2012  | [42] |
| Canada | 14.0 (10-17)    | 28 | 3 (10.7)  | 4 (14.3) | NS (2018)  | [10] |

<sup>1</sup> NS (2001), not specified (year of publication)

**Table S5.** Frequency and prevalence of *ETV6/NTRK3* and *AKAP9/BRAF* rearrangements, and of point mutations in the *RAS* family genes in pediatric PTC of radiation and sporadic etiology in different countries

| Country                  | Patients' age  | N  | Positive | %    | Sampling               | Reference     |
|--------------------------|----------------|----|----------|------|------------------------|---------------|
| <b><i>ETV6/NTRK3</i></b> |                |    |          |      |                        |               |
| <i>Radiation-related</i> |                |    |          |      |                        |               |
| Ukraine                  | 18.0 (5-19)    | 26 | 2        | 7.7  | 1998-2007              | [6]           |
| Ukraine                  | 22.7 (14-32)   | 62 | 9        | 14.5 | 1998-2008              | [62]          |
| Ukraine                  | 15.9 (13-18)   | 16 | 1        | 6.3  | 1998-2004              | [8]           |
| <i>Sporadic</i>          |                |    |          |      |                        |               |
| Belarus                  | 12.4 (2-16)    | 34 | 6        | 17.6 | 2001-2007              | Present study |
| Ukraine                  | 15.6 (5-19)    | 27 | 2        | 7.4  | 1999-2009              | [6]           |
| Ukraine                  | 15.4 (10-18)   | 32 | 2        | 6.3  | 1998-2004              | [8]           |
| Saudi Arabia             | 17 (5-18)      | 48 | 4        | 8.3  | 2004-2019              | [22]          |
| Japan                    | 12.7 (9-14)    | 9  | 1        | 11.9 | 2013-2014              | [27]          |
| Brazil                   | ≤18            | 35 | 3        | 8.6  | NS (2017) <sup>1</sup> | [28]          |
| USA                      | 13 (8-17)      | 18 | 3        | 16.7 | 2002-2014              | [63]          |
| USA                      | 15 (6-18)      | 27 | 5        | 18.5 | 2009-2015              | [64]          |
| USA                      | <10-23         | 25 | 2        | 8.0  | 2005-2016              | [13]          |
| USA                      | 14 (6-18)      | 63 | 2        | 3.2  | 1989-2012              | [42]          |
| <b><i>AKAP9/BRAF</i></b> |                |    |          |      |                        |               |
| <i>Radiation-related</i> |                |    |          |      |                        |               |
| Belarus                  | 11.4 ± 3.6     | 28 | 3        | 10.7 | 1991-1992              | [2]           |
| Belarus                  | 16.0 ± 5.0     | 64 | 0        | 0    | 1995-1998              | [2]           |
| Ukraine                  | 18.0 (5-19)    | 26 | 1        | 3.8  | 1998-2007              | [6]           |
| Ukraine                  | 15.9 (13-18)   | 16 | 0        | 0    | 1998-2004              | [8]           |
| <i>Sporadic</i>          |                |    |          |      |                        |               |
| Belarus                  | 12.4 (2-16)    | 34 | 0        | 0    | 2001-2007              | Present study |
| Ukraine                  | 15.6 (5-19)    | 27 | 0        | 0    | 1999-2009              | [6]           |
| Ukraine                  | 15.4 (10-18)   | 32 | 0        | 0    | 1998-2004              | [8]           |
| Japan                    | 12.7 (9-14)    | 9  | 0        | 0    | 2013-2014              | [27]          |
| <b><i>RAS</i></b>        |                |    |          |      |                        |               |
| <i>Radiation-related</i> |                |    |          |      |                        |               |
| Belarus                  | 5-19           | 33 | 0        | 0    | 1991-1992              | [65]          |
| Belarus                  | NS, "children" | 34 | 0        | 0    | 1992                   | [66]          |
| Ukraine                  | 14.3           | 15 | 0        | 0    | 1998-2000              | [4]           |
| Ukraine                  | 18.0 (5-19)    | 26 | 0        | 0    | 1998-2007              | [6]           |
| Ukraine                  | 20-29          | 62 | 5        | 8.0  | 1998-2008              | [62]          |

|                 |              |    |   |      |                             |               |
|-----------------|--------------|----|---|------|-----------------------------|---------------|
| Ukraine         | 15.9 (13-18) | 16 | 0 | 0    | 1998-2004                   | [8]           |
| Czech Republic  | NS (6-20)    | 2  | 1 | 50.0 | NS (2003-2017) <sup>2</sup> | [9]           |
| <i>Sporadic</i> |              |    |   |      |                             |               |
| Belarus         | 12.4 (2-16)  | 34 | 0 | 0    | 2001-2007                   | Present study |
| Ukraine         | 15.6 (5-19)  | 27 | 2 | 7.4  | 1999-2009                   | [6]           |
| Ukraine         | 15.4 (10-18) | 32 | 1 | 3.1  | 1998-2004                   | [8]           |
| Czech Republic  | NS (6-20)    | 81 | 1 | 1.2  | NS (2003-2017)              | [9]           |
| The Netherlands | 12.8 (9-16)  | 8  | 0 | 0    | NS (2001)                   | [67]          |
| Italy/France    | 8-19         | 28 | 1 | 3.6  | 2002-2010                   | [15]          |
| Saudi Arabia    | ≤18          | 79 | 2 | 2.5  | 1998-2015                   | [20]          |
| Saudi Arabia    | 17 (5-18)    | 48 | 2 | 4.2  | 2004-2019                   | [22]          |
| Japan           | 11.3         | 31 | 0 | 0    | 1962-1995                   | [4]           |
| Japan           | 12.7 (9-14)  | 9  | 0 | 0    | 2013-2014                   | [27]          |
| USA             | 17 (6-21)    | 31 | 2 | 6.5  | NS (1999)                   | [68]          |
| USA             | 11-21        | 11 | 0 | 0    | NS (2005)                   | [29]          |
| USA             | 15 (4-18)    | 62 | 4 | 6.5  | NS (2018)                   | [38]          |
| USA             | 12-22        | 8  | 2 | 25.0 | NS (2017)                   | [39]          |
| USA             | 14.7 (7-18)  | 34 | 1 | 2.9  | 2001-2013                   | [36]          |
| USA             | 12-16        | 5  | 1 | 20.0 | 2009-2012                   | [32]          |
| USA             | 14 (6-18)    | 63 | 4 | 6.4  | 1989-2012                   | [42]          |

<sup>1</sup> NS (2017), not specified (year of publication); <sup>2</sup> years of sampling in the study;



**Table S6.** Primer and probe sequences for detections of oncogenes

2

| Gene                         | Primer Sequence, 5'-3'                                        | Annealing temperature (°C) | Amplicon size (bp) | Reference     | Southern blotting probe sequence, 5'-3' |
|------------------------------|---------------------------------------------------------------|----------------------------|--------------------|---------------|-----------------------------------------|
| <i>BRAF (ex15)</i>           | ACATACTTATTGACTCTAAGAGGAAAGATGAA<br>GATTTTGTGAATACTGGGAACATGA | 60                         | 401                | [27]          |                                         |
| <i>H-RAS (codons 12, 13)</i> | AGCAGGGCCCTCCTTGGCAG<br>CAGCCAGCCCTATCCTGGCTG                 | 65                         | 261                | [27]          |                                         |
| <i>H-RAS (codon 61)</i>      | CAGGGAGAGGCTGGCTGTGTG<br>CCACCTGTGCGGCGTGGGCT                 | 65                         | 298                | [27]          |                                         |
| <i>K-RAS (codons 12, 13)</i> | GGTACTGGTGGAGTATTTGATAGT<br>CTCATGAAAATGGTCAGAGAAACCT         | 60                         | 290                | [27]          |                                         |
| <i>K-RAS (codon 61)</i>      | GGTGCACCTGTAATAATCCAGACTG<br>CTATAATTACTCCTTAATGTCAGCTT       | 60                         | 268                | [27]          |                                         |
| <i>N-RAS (codons 12, 13)</i> | CACACTAGGGTTTTTCATTTCATTG<br>GGTAAAGATGATCCGACAAGTGAGCG       | 63                         | 283                | [27]          |                                         |
| <i>N-RAS (codon 61)</i>      | TTGAACTTCCCTCCCTCCCTGC<br>AGCTCTATCTTCCCTAGTGTGGTAA           | 65                         | 316                | [27]          |                                         |
| <i>RET/PTC1</i>              | GCCTGGAGGAGCTCACCAA<br>CTCTGCCTTTCAGATGGAA                    | 56                         | 252                | [27]          | GCGTTACCATCGAGGATCCAAA                  |
| <i>RET/PTC3</i>              | ACCTGCCAGTGGTTATCAAGCT<br>TTCGCCTTCTCCTAGAGTTTTTCC            | 59                         | 154                | [27]          | AGAACAGTCAGGAGGATCCAAA                  |
| <i>AKAP9/BRAF</i>            | AGCAAGAACAGTTGATTTTGGGA<br>GCAGACAAACCTGTGGTTGA               | 56                         | 181                | [2]           | AAACTTCAGAAAGAACTCAATGTACTT             |
| <i>ETV6(ex4)/NTRK3</i>       | CATTCTTCCACCCTGGAAAC<br>TCCTCACCCTGATGACAGC                   | 55                         | 97                 | [62]          | AACCATGAAGAAGGTCCCGT                    |
| <i>ETV6(ex5)/NTRK3</i>       | AAGCCCATCAACCTCTCTCA<br>TCCTCACCCTGATGACAGC                   | 60                         | 139                | [62]          | AGAATAGCAGGTCCCGTGGC                    |
| <i>TBL1XR1/RET</i>           | AAGATGTTCCAAGCAACAAGGATGTCACA<br>CCAAGTTCTTCCGAGGGAAT         | 62                         | 243                | Present study | AGTAGACAAGGAGGATCCAAA                   |
| <i>TNIP1/RET</i>             | TCCAAGATTGAAATGGAGGAGACC<br>TTCGCCTTCTCCTAGAGTTTTTCC          | 58                         | 216                | Present study | GCTCAACAAGGAGGATCCAA                    |

3

## References

1. Nikiforova, M.N.; Ciampi, R.; Salvatore, G.; Santoro, M.; Gandhi, M.; Knauf, J.A.; Thomas, G.A.; Jeremiah, S.; Bogdanova, T.I.; Tronko, M.D., et al. Low prevalence of BRAF mutations in radiation-induced thyroid tumors in contrast to sporadic papillary carcinomas. *Cancer Lett* **2004**, *209*, 1-6, doi:10.1016/j.canlet.2003.12.004.
2. Ciampi, R.; Knauf, J.A.; Kerler, R.; Gandhi, M.; Zhu, Z.; Nikiforova, M.N.; Rabes, H.M.; Fagin, J.A.; Nikiforov, Y.E. Oncogenic AKAP9-BRAF fusion is a novel mechanism of MAPK pathway activation in thyroid cancer. *J Clin Invest* **2005**, *115*, 94-101, doi:10.1172/JCI23237.
3. Powell, N.; Jeremiah, S.; Morishita, M.; Dudley, E.; Bethel, J.; Bogdanova, T.; Tronko, M.; Thomas, G. Frequency of BRAF T1796A mutation in papillary thyroid carcinoma relates to age of patient at diagnosis and not to radiation exposure. *J Pathol* **2005**, *205*, 558-564, doi:10.1002/path.1736.
4. Kumagai, A.; Namba, H.; Saenko, V.A.; Ashizawa, K.; Ohtsuru, A.; Ito, M.; Ishikawa, N.; Sugino, K.; Ito, K.; Jeremiah, S., et al. Low frequency of BRAFT1796A mutations in childhood thyroid carcinomas. *J Clin Endocrinol Metab* **2004**, *89*, 4280-4284, doi:10.1210/jc.2004-0172.
5. Handkiewicz-Junak, D.; Swierniak, M.; Rusinek, D.; Oczko-Wojciechowska, M.; Dom, G.; Maenhaut, C.; Unger, K.; Detours, V.; Bogdanova, T.; Thomas, G., et al. Gene signature of the post-Chernobyl papillary thyroid cancer. *Eur J Nucl Med Mol Imaging* **2016**, *43*, 1267-1277, doi:10.1007/s00259-015-3303-3.
6. Ricarte-Filho, J.C.; Li, S.; Garcia-Rendueles, M.E.; Montero-Conde, C.; Voza, F.; Knauf, J.A.; Heguy, A.; Viale, A.; Bogdanova, T.; Thomas, G.A., et al. Identification of kinase fusion oncogenes in post-Chernobyl radiation-induced thyroid cancers. *J Clin Invest* **2013**, *123*, 4935-4944, doi:10.1172/JCI69766.
7. Leeman-Neill, R.J.; Brenner, A.V.; Little, M.P.; Bogdanova, T.I.; Hatch, M.; Zurnadzy, L.Y.; Mabuchi, K.; Tronko, M.D.; Nikiforov, Y.E. RET/PTC and PAX8/PPARGgamma chromosomal rearrangements in post-Chernobyl thyroid cancer and their association with iodine-131 radiation dose and other characteristics. *Cancer* **2013**, *119*, 1792-1799, doi:10.1002/cncr.27893.
8. Morton, L.M.; Karyadi, D.M.; Stewart, C.; Bogdanova, T.I.; Dawson, E.T.; Steinberg, M.K.; Dai, J.; Hartley, S.W.; Schonfeld, S.J.; Sampson, J.N., et al. Radiation-related genomic profile of papillary thyroid carcinoma after the Chernobyl accident. *Science* **2021**, *372*, doi:10.1126/science.abg2538.
9. Pekova, B.; Dvorakova, S.; Sykorova, V.; Vacinova, G.; Vaclavikova, E.; Moravcova, J.; Kutra, R.; Vlcek, P.; Sykorova, P.; Kodetova, D., et al. Somatic genetic alterations in a large cohort of pediatric thyroid nodules. *Endocr Connect* **2019**, *8*, 796-805, doi:10.1530/EC-19-0069.
10. Wasserman, J.D.; Sabbaghian, N.; Fahiminiya, S.; Chami, R.; Mete, O.; Acker, M.;

- Wu, M.K.; Shlien, A.; de Kock, L.; Foulkes, W.D. DICER1 Mutations Are Frequent in Adolescent-Onset Papillary Thyroid Carcinoma. *J Clin Endocrinol Metab* **2018**, *103*, 2009-2015, doi:10.1210/jc.2017-02698.
11. Castro, P.; Patino, E.; Fierro, F.; Rojas, C.; Buitrago, G.; Olaya, N. Clinical characteristics, surgical approach, BRAFV600E mutation and sodium iodine symporter expression in pediatric patients with thyroid carcinoma. *Journal of Pediatric Endocrinology and Metabolism* **2020**, DOI: 10.1515/jpem-2020-0201, in press, doi:10.1515/jpem-2020-0201.
  12. Sisdelli, L.; Cordioli, M.; Vaisman, F.; Moraes, L.; Colozza-Gama, G.A.; Alves, P.A.G., Jr.; Araujo, M.L., Jr.; Alves, M.T.S.; Monte, O.; Longui, C.A., et al. AGK-BRAF is associated with distant metastasis and younger age in pediatric papillary thyroid carcinoma. *Pediatr Blood Cancer* **2019**, *66*, e27707, doi:10.1002/pbc.27707.
  13. Potter, S.L.; Reuther, J.; Chandramohan, R.; Gandhi, I.; Hollingsworth, F.; Sayeed, H.; Voicu, H.; Kakkar, N.; Bakshi, K.S.; Sarabia, S.F., et al. Integrated DNA and RNA sequencing reveals targetable alterations in metastatic pediatric papillary thyroid carcinoma. *Pediatr Blood Cancer* **2020**, 10.1002/pbc.28741, e28741, doi:10.1002/pbc.28741.
  14. Stanojevic, B.; Dzodic, R.; Saenko, V.; Milovanovic, Z.; Pupic, G.; Zivkovic, O.; Markovic, I.; Djuriscic, I.; Buta, M.; Dimitrijevic, B., et al. Mutational and clinico-pathological analysis of papillary thyroid carcinoma in Serbia. *Endocr J* **2011**, *58*, 381-393.
  15. Sassolas, G.; Hafdi-Nejjari, Z.; Ferraro, A.; Decaussin-Petrucci, M.; Rousset, B.; Borson-Chazot, F.; Borbone, E.; Berger, N.; Fusco, A. Oncogenic alterations in papillary thyroid cancers of young patients. *Thyroid* **2012**, *22*, 17-26, doi:10.1089/thy.2011.0215.
  16. Lima, J.; Trovisco, V.; Soares, P.; Maximo, V.; Magalhaes, J.; Salvatore, G.; Santoro, M.; Bogdanova, T.; Tronko, M.; Abrosimov, A., et al. BRAF mutations are not a major event in post-Chernobyl childhood thyroid carcinomas. *J Clin Endocrinol Metab* **2004**, *89*, 4267-4271, doi:10.1210/jc.2003-032224.
  17. Espadinha, C.; Santos, J.R.; Sobrinho, L.G.; Bugalho, M.J. Expression of iodine metabolism genes in human thyroid tissues: evidence for age and BRAFV600E mutation dependency. *Clin Endocrinol (Oxf)* **2009**, *70*, 629-635, doi:10.1111/j.1365-2265.2008.03376.x.
  18. Onder, S.; Ozturk Sari, S.; Yegen, G.; Sormaz, I.C.; Yilmaz, I.; Poyrazoglu, S.; Sanli, Y.; Giles Senyurek, Y.; Kapran, Y.; Mete, O. Classic Architecture with Multicentricity and Local Recurrence, and Absence of TERT Promoter Mutations are Correlates of BRAF (V600E) Harboring Pediatric Papillary Thyroid Carcinomas. *Endocr Pathol* **2016**, *27*, 153-161, doi:10.1007/s12022-016-9420-0.
  19. Poyrazoglu, S.; Bundak, R.; Bas, F.; Yegen, G.; Sanli, Y.; Darendeliler, F.

- Clinicopathological Characteristics of Papillary Thyroid Cancer in Children with Emphasis on Pubertal Status and Association with BRAF(V600E) Mutation. *J Clin Res Pediatr Endocrinol* **2017**, *9*, 185-193, doi:10.4274/jcrpe.3873.
20. Alzahrani, A.S.; Murugan, A.K.; Qasem, E.; Alswailem, M.; Al-Hindi, H.; Shi, Y. Single Point Mutations in Pediatric Differentiated Thyroid Cancer. *Thyroid* **2017**, *27*, 189-196, doi:10.1089/thy.2016.0339.
  21. Zou, M.; Baitei, E.Y.; Alzahrani, A.S.; BinHumaid, F.S.; Alkhafaji, D.; Al-Rijjal, R.A.; Meyer, B.F.; Shi, Y. Concomitant RAS, RET/PTC, or BRAF mutations in advanced stage of papillary thyroid carcinoma. *Thyroid* **2014**, *24*, 1256-1266, doi:10.1089/thy.2013.0610.
  22. Alzahrani, A.S.; Alswailem, M.; Alswailem, A.A.; Al-Hindi, H.; Goljan, E.; Alsudairy, N.; Abouelhoda, M. Genetic Alterations in Pediatric Thyroid Cancer Using a Comprehensive Childhood Cancer Gene Panel. *J Clin Endocrinol Metab* **2020**, *105*, doi:10.1210/clinem/dgaa389.
  23. Chakraborty, D., Shaky, S., Ballal, S., Agarwal, S., Bal, C. BRAF V600E and TERT promoter mutations in paediatric and young adult papillary thyroid cancer and clinicopathological correlation. *Journal of Pediatric Endocrinology and Metabolism* **2020**, *in press*, doi:https://doi.org/10.1515/jpem-2020-0174.
  24. Geng, J.; Wang, H.; Liu, Y.; Tai, J.; Jin, Y.; Zhang, J.; He, L.; Fu, L.; Qin, H.; Song, Y., et al. Correlation between BRAF (V600E) mutation and clinicopathological features in pediatric papillary thyroid carcinoma. *Sci China Life Sci* **2017**, *60*, 729-738, doi:10.1007/s11427-017-9083-8.
  25. Huang, M.; Yan, C.; Wei, H.; Lv, Y.; Ling, R. Clinicopathological characteristics and prognosis of thyroid cancer in northwest China: A population-based retrospective study of 2490 patients. *Thorac Cancer* **2018**, *9*, 1453-1460, doi:10.1111/1759-7714.12858.
  26. Oishi, N.; Kondo, T.; Nakazawa, T.; Mochizuki, K.; Inoue, T.; Kasai, K.; Tahara, I.; Yabuta, T.; Hirokawa, M.; Miyauchi, A., et al. Frequent BRAF (V600E) and Absence of TERT Promoter Mutations Characterize Sporadic Pediatric Papillary Thyroid Carcinomas in Japan. *Endocr Pathol* **2017**, *28*, 103-111, doi:10.1007/s12022-017-9470-y.
  27. Mitsutake, N.; Fukushima, T.; Matsuse, M.; Rogounovitch, T.; Saenko, V.; Uchino, S.; Ito, M.; Suzuki, K.; Suzuki, S.; Yamashita, S. BRAF(V600E) mutation is highly prevalent in thyroid carcinomas in the young population in Fukushima: a different oncogenic profile from Chernobyl. *Sci Rep* **2015**, *5*, 16976, doi:10.1038/srep16976.
  28. Cordioli, M.I.; Moraes, L.; Bastos, A.U.; Besson, P.; Alves, M.T.; Delcelo, R.; Monte, O.; Longui, C.; Cury, A.N.; Cerutti, J.M. Fusion Oncogenes Are the Main Genetic Events Found in Sporadic Papillary Thyroid Carcinomas from Children. *Thyroid* **2017**, *27*, 182-188, doi:10.1089/thy.2016.0387.

29. Penko, K.; Livezey, J.; Fenton, C.; Patel, A.; Nicholson, D.; Flora, M.; Oakley, K.; Tuttle, R.M.; Francis, G. BRAF mutations are uncommon in papillary thyroid cancer of young patients. *Thyroid* **2005**, *15*, 320-325, doi:10.1089/thy.2005.15.320.
30. Rosenbaum, E.; Hosler, G.; Zahurak, M.; Cohen, Y.; Sidransky, D.; Westra, W.H. Mutational activation of BRAF is not a major event in sporadic childhood papillary thyroid carcinoma. *Mod Pathol* **2005**, *18*, 898-902, doi:10.1038/modpathol.3800252.
31. Monaco, S.E.; Pantanowitz, L.; Khalbuss, W.E.; Benkovich, V.A.; Ozolek, J.; Nikiforova, M.N.; Simons, J.P.; Nikiforov, Y.E. Cytomorphological and molecular genetic findings in pediatric thyroid fine-needle aspiration. *Cancer Cytopathol* **2012**, *120*, 342-350, doi:10.1002/cncy.21199.
32. Buryk, M.A.; Monaco, S.E.; Witchel, S.F.; Mehta, D.K.; Gurtunca, N.; Nikiforov, Y.E.; Simons, J.P. Preoperative cytology with molecular analysis to help guide surgery for pediatric thyroid nodules. *Int J Pediatr Otorhinolaryngol* **2013**, *77*, 1697-1700, doi:10.1016/j.ijporl.2013.07.029.
33. Ballester, L.Y.; Sarabia, S.F.; Sayeed, H.; Patel, N.; Baalwa, J.; Athanassaki, I.; Hernandez, J.A.; Fang, E.; Quintanilla, N.M.; Roy, A., et al. Integrating Molecular Testing in the Diagnosis and Management of Children with Thyroid Lesions. *Pediatr Dev Pathol* **2016**, *19*, 94-100, doi:10.2350/15-05-1638-OA.1.
34. Gertz, R.J.; Nikiforov, Y.; Rehrauer, W.; McDaniel, L.; Lloyd, R.V. Mutation in BRAF and Other Members of the MAPK Pathway in Papillary Thyroid Carcinoma in the Pediatric Population. *Arch Pathol Lab Med* **2016**, *140*, 134-139, doi:10.5858/arpa.2014-0612-OA.
35. Givens, D.J.; Buchmann, L.O.; Agarwal, A.M.; Grimmer, J.F.; Hunt, J.P. BRAF V600E does not predict aggressive features of pediatric papillary thyroid carcinoma. *Laryngoscope* **2014**, *124*, E389-393, doi:10.1002/lary.24668.
36. Nikita, M.E.; Jiang, W.; Cheng, S.M.; Hantash, F.M.; McPhaul, M.J.; Newbury, R.O.; Phillips, S.A.; Reitz, R.E.; Waldman, F.M.; Newfield, R.S. Mutational Analysis in Pediatric Thyroid Cancer and Correlations with Age, Ethnicity, and Clinical Presentation. *Thyroid* **2016**, *26*, 227-234, doi:10.1089/thy.2015.0401.
37. Henke, L.E.; Perkins, S.M.; Pfeifer, J.D.; Ma, C.; Chen, Y.; DeWees, T.; Grigsby, P.W. BRAF V600E mutational status in pediatric thyroid cancer. *Pediatr Blood Cancer* **2014**, *61*, 1168-1172, doi:10.1002/pbc.24935.
38. Mostoufi-Moab, S.; Labourier, E.; Sullivan, L.; LiVolsi, V.; Li, Y.; Xiao, R.; Beaudenon-Huibregtse, S.; Kazahaya, K.; Adzick, N.S.; Baloch, Z., et al. Molecular Testing for Oncogenic Gene Alterations in Pediatric Thyroid Lesions. *Thyroid* **2018**, *28*, 60-67, doi:10.1089/thy.2017.0059.
39. Shifrin, A.L.; Fischer, M.; Paul, T.; Erler, B.; Gheysens, K.; Baodhankar, P.; Song-Yang, J.W.; Taylor, S.; Timmaraju, V.A.; Topilow, A., et al. Mutational analysis of metastatic lymph nodes from papillary thyroid carcinoma in adult and pediatric

- patients. *Surgery* **2017**, *161*, 176-187, doi:10.1016/j.surg.2016.10.002.
40. Vanden Borre, P.; Schrock, A.B.; Anderson, P.M.; Morris, J.C., 3rd; Heilmann, A.M.; Holmes, O.; Wang, K.; Johnson, A.; Waguespack, S.G.; Ou, S.I., et al. Pediatric, Adolescent, and Young Adult Thyroid Carcinoma Harbors Frequent and Diverse Targetable Genomic Alterations, Including Kinase Fusions. *Oncologist* **2017**, *22*, 255-263, doi:10.1634/theoncologist.2016-0279.
  41. Hardee, S.; Prasad, M.L.; Hui, P.; Dinanuer, C.A.; Morotti, R.A. Pathologic Characteristics, Natural History, and Prognostic Implications of BRAF(V600E) Mutation in Pediatric Papillary Thyroid Carcinoma. *Pediatr Dev Pathol* **2017**, *20*, 206-212, doi:10.1177/1093526616689628.
  42. Franco, A.T.; Labourier, E.; Ablordeppey, K.K.; Surrey, L.F.; Mostoufi-Moab, S.; Isaza, A.; Adzick, N.S.; Kazahaya, K.; Kumar, G.; Bauer, A.J. miRNA expression can classify pediatric thyroid lesions and increases the diagnostic yield of mutation testing. *Pediatr Blood Cancer* **2020**, *67*, e28276, doi:10.1002/pbc.28276.
  43. Klugbauer, S.; Lengfelder, E.; Demidchik, E.P.; Rabes, H.M. High prevalence of RET rearrangement in thyroid tumors of children from Belarus after the Chernobyl reactor accident. *Oncogene* **1995**, *11*, 2459-2467.
  44. Nikiforov, Y.E.; Rowland, J.M.; Bove, K.E.; Monforte-Munoz, H.; Fagin, J.A. Distinct pattern of ret oncogene rearrangements in morphological variants of radiation-induced and sporadic thyroid papillary carcinomas in children. *Cancer Res* **1997**, *57*, 1690-1694.
  45. Smida, J.; Salassidis, K.; Hieber, L.; Zitzelsberger, H.; Kellerer, A.M.; Demidchik, E.P.; Negele, T.; Spelsberg, F.; Lengfelder, E.; Werner, M., et al. Distinct frequency of ret rearrangements in papillary thyroid carcinomas of children and adults from Belarus. *Int J Cancer* **1999**, *80*, 32-38, doi:10.1002/(sici)1097-0215(19990105)80:1<32::aid-ijc7>3.0.co;2-l.
  46. Santoro, M.; Thomas, G.A.; Vecchio, G.; Williams, G.H.; Fusco, A.; Chiappetta, G.; Pozcharskaya, V.; Bogdanova, T.I.; Demidchik, E.P.; Cherstvoy, E.D., et al. Gene rearrangement and Chernobyl related thyroid cancers. *Br J Cancer* **2000**, *82*, 315-322, doi:10.1054/bjoc.1999.0921.
  47. Pisarchik, A.V.; Ermak, G.; Fomicheva, V.; Kartel, N.A.; Figge, J. The ret/PTC1 rearrangement is a common feature of Chernobyl-associated papillary thyroid carcinomas from Belarus. *Thyroid* **1998**, *8*, 133-139, doi:10.1089/thy.1998.8.133.
  48. Pisarchik, A.V.; Ermak, G.; Demidchik, E.P.; Mikhalevich, L.S.; Kartel, N.A.; Figge, J. Low prevalence of the ret/PTC3r1 rearrangement in a series of papillary thyroid carcinomas presenting in Belarus ten years post-Chernobyl. *Thyroid* **1998**, *8*, 1003-1008, doi:10.1089/thy.1998.8.1003.
  49. Thomas, G.A.; Bunnell, H.; Cook, H.A.; Williams, E.D.; Nerovnya, A.; Cherstvoy, E.D.; Tronko, N.D.; Bogdanova, T.I.; Chiappetta, G.; Viglietto, G., et al. High

- prevalence of RET/PTC rearrangements in Ukrainian and Belarussian post-Chernobyl thyroid papillary carcinomas: a strong correlation between RET/PTC3 and the solid-follicular variant. *J Clin Endocrinol Metab* **1999**, *84*, 4232-4238, doi:10.1210/jcem.84.11.6129.
50. Rabes, H.M.; Demidchik, E.P.; Sidorow, J.D.; Lengfelder, E.; Beimfohr, C.; Hoelzel, D.; Klugbauer, S. Pattern of radiation-induced RET and NTRK1 rearrangements in 191 post-chernobyl papillary thyroid carcinomas: biological, phenotypic, and clinical implications. *Clin Cancer Res* **2000**, *6*, 1093-1103.
  51. Elisei, R.; Romei, C.; Vorontsova, T.; Cosci, B.; Veremeychik, V.; Kuchinskaya, E.; Basolo, F.; Demidchik, E.P.; Miccoli, P.; Pinchera, A., et al. RET/PTC rearrangements in thyroid nodules: studies in irradiated and not irradiated, malignant and benign thyroid lesions in children and adults. *J Clin Endocrinol Metab* **2001**, *86*, 3211-3216, doi:10.1210/jcem.86.7.7678.
  52. Detours, V.; Wattel, S.; Venet, D.; Hutsebaut, N.; Bogdanova, T.; Tronko, M.D.; Dumont, J.E.; Franc, B.; Thomas, G.; Maenhaut, C. Absence of a specific radiation signature in post-Chernobyl thyroid cancers. *Br J Cancer* **2005**, *92*, 1545-1552, doi:10.1038/sj.bjc.6602521.
  53. Bounacer, A.; Wicker, R.; Caillou, B.; Cailleux, A.F.; Sarasin, A.; Schlumberger, M.; Suarez, H.G. High prevalence of activating ret proto-oncogene rearrangements, in thyroid tumors from patients who had received external radiation. *Oncogene* **1997**, *15*, 1263-1273, doi:10.1038/sj.onc.1200206.
  54. Basolo, F.; Giannini, R.; Monaco, C.; Melillo, R.M.; Carlomagno, F.; Pancrazi, M.; Salvatore, G.; Chiappetta, G.; Pacini, F.; Elisei, R., et al. Potent mitogenicity of the RET/PTC3 oncogene correlates with its prevalence in tall-cell variant of papillary thyroid carcinoma. *Am J Pathol* **2002**, *160*, 247-254, doi:10.1016/S0002-9440(10)64368-4.
  55. Bongarzone, I.; Fugazzola, L.; Vigneri, P.; Mariani, L.; Mondellini, P.; Pacini, F.; Basolo, F.; Pinchera, A.; Pilotti, S.; Pierotti, M.A. Age-related activation of the tyrosine kinase receptor protooncogenes RET and NTRK1 in papillary thyroid carcinoma. *J Clin Endocrinol Metab* **1996**, *81*, 2006-2009, doi:10.1210/jcem.81.5.8626874.
  56. Wang, Y.L.; Zhang, R.M.; Luo, Z.W.; Wu, Y.; Du, X.; Wang, Z.Y.; Zhu, Y.X.; Li, D.S.; Ji, Q.H. High frequency of level II-V lymph node involvement in RET/PTC positive papillary thyroid carcinoma. *Eur J Surg Oncol* **2008**, *34*, 77-81, doi:10.1016/j.ejso.2007.08.012.
  57. Lam, K.Y.; Lo, C.Y.; Leung, P.S. High prevalence of RET proto-oncogene activation (RET/PTC) in papillary thyroid carcinomas. *Eur J Endocrinol* **2002**, *147*, 741-745.
  58. Nakazawa, T.; Kondo, T.; Kobayashi, Y.; Takamura, N.; Murata, S.; Kameyama, K.; Muramatsu, A.; Ito, K.; Kobayashi, M.; Katoh, R. RET gene rearrangements

- (RET/PTC1 and RET/PTC3) in papillary thyroid carcinomas from an iodine-rich country (Japan). *Cancer* **2005**, *104*, 943-951, doi:10.1002/cncr.21270.
59. Motomura, T.; Nikiforov, Y.E.; Namba, H.; Ashizawa, K.; Nagataki, S.; Yamashita, S.; Fagin, J.A. ret rearrangements in Japanese pediatric and adult papillary thyroid cancers. *Thyroid* **1998**, *8*, 485-489, doi:10.1089/thy.1998.8.485.
  60. Rhoden, K.J.; Johnson, C.; Brandao, G.; Howe, J.G.; Smith, B.R.; Tallini, G. Real-time quantitative RT-PCR identifies distinct c-RET, RET/PTC1 and RET/PTC3 expression patterns in papillary thyroid carcinoma. *Lab Invest* **2004**, *84*, 1557-1570, doi:10.1038/labinvest.3700198.
  61. Fenton, C.L.; Lukes, Y.; Nicholson, D.; Dinauer, C.A.; Francis, G.L.; Tuttle, R.M. The ret/PTC mutations are common in sporadic papillary thyroid carcinoma of children and young adults. *J Clin Endocrinol Metab* **2000**, *85*, 1170-1175, doi:10.1210/jcem.85.3.6472.
  62. Leeman-Neill, R.J.; Kelly, L.M.; Liu, P.; Brenner, A.V.; Little, M.P.; Bogdanova, T.I.; Evdokimova, V.N.; Hatch, M.; Zurnadzy, L.Y.; Nikiforova, M.N., et al. ETV6-NTRK3 is a common chromosomal rearrangement in radiation-associated thyroid cancer. *Cancer* **2014**, *120*, 799-807, doi:10.1002/cncr.28484.
  63. Picarsic, J.L.; Buryk, M.A.; Ozolek, J.; Ranganathan, S.; Monaco, S.E.; Simons, J.P.; Witchel, S.F.; Gurtunca, N.; Joyce, J.; Zhong, S., et al. Molecular Characterization of Sporadic Pediatric Thyroid Carcinoma with the DNA/RNA ThyroSeq v2 Next-Generation Sequencing Assay. *Pediatr Dev Pathol* **2016**, *19*, 115-122, doi:10.2350/15-07-1667-OA.1.
  64. Prasad, M.L.; Vyas, M.; Horne, M.J.; Virk, R.K.; Morotti, R.; Liu, Z.; Tallini, G.; Nikiforova, M.N.; Christison-Lagay, E.R.; Udelsman, R., et al. NTRK fusion oncogenes in pediatric papillary thyroid carcinoma in northeast United States. *Cancer* **2016**, *122*, 1097-1107, doi:10.1002/cncr.29887.
  65. Nikiforov, Y.E.; Nikiforova, M.N.; Gnepp, D.R.; Fagin, J.A. Prevalence of mutations of ras and p53 in benign and malignant thyroid tumors from children exposed to radiation after the Chernobyl nuclear accident. *Oncogene* **1996**, *13*, 687-693.
  66. Suchy, B.; Waldmann, V.; Klugbauer, S.; Rabes, H.M. Absence of RAS and p53 mutations in thyroid carcinomas of children after Chernobyl in contrast to adult thyroid tumours. *Br J Cancer* **1998**, *77*, 952-955, doi:10.1038/bjc.1998.157.
  67. Pauws, E.; Tummers, R.F.; Ris-Stalpers, C.; de Vijlder, J.J.; Voute, T. Absence of activating mutations in ras and gsp oncogenes in a cohort of nine patients with sporadic pediatric thyroid tumors. *Med Pediatr Oncol* **2001**, *36*, 630-634, doi:10.1002/mpo.1140.
  68. Fenton, C.; Anderson, J.; Lukes, Y.; Dinauer, C.A.; Tuttle, R.M.; Francis, G.L. Ras mutations are uncommon in sporadic thyroid cancer in children and young adults. *J Endocrinol Invest* **1999**, *22*, 781-789, doi:10.1007/BF03343644.
